# Supplementary material for: A Complex Cell Division Machinery Was Present in the Last Common Ancestor of Eukaryotes
Source: PubMed Central journal article supplement (PMC2661371; doi:10.1371/journal.pone.0005021), 2009-04-07
Supplement: pone.0005021.s008.pdf [file pone.0005021.s008.pdf]

Supplementary Information Table S2. Functional domain composition of the mammalian midbody proteins.

| Short name | Mammalian functional domains       |                          |                        |                             |                          |                     |
|------------|------------------------------------|--------------------------|------------------------|-----------------------------|--------------------------|---------------------|
| act1       | Actin (PF00022.9)                  |                          |                        |                             |                          |                     |
| act2       | Spectrin (PF00435.11)              | SH3_1 (PF00018.18)       | efhand (PF00036.22)    | efhand_Ca_insen (PF08726.1) | SH3_2 (PF07653.7)        |                     |
| act3       | Actin (PF00022.9)                  |                          |                        |                             |                          |                     |
| act4       | WD40 (PF00400.22)                  |                          |                        |                             |                          |                     |
| act5       | Actin (PF00022.9)                  |                          |                        |                             |                          |                     |
| act6       | G-patch (PF01585.13)               | TFP11 (PF08697.1)        |                        |                             |                          |                     |
| act7       | Cofilin_ADF (PF00241.10)           |                          |                        |                             |                          |                     |
| act8       | Myosin_head (PF00063.11)           | IQ (PF00612.17)          | Myosin_TH1 (PF06017.4) | SH3_1 (PF00018.18)          |                          |                     |
| act9       | Myosin_N (PF02736.9)               | Myosin_head (PF00063.11) | IQ (PF00612.17)        | Myosin_tail_1 (PF01576.9)   | Filament (PF00038.11)    |                     |
| act10      | WW (PF00397.16)                    | IQ (PF00612.17)          | RasGAP (PF00616.9)     | RasGAP_C (PF03836.5)        |                          |                     |
| act11      | efhand (PF00036.22)                |                          |                        |                             |                          |                     |
| act12      | F_actin_cap_B (PF01115.8)          |                          |                        |                             |                          |                     |
| act13      | LIM (PF00412.12)                   |                          |                        |                             |                          |                     |
| act14      | Filament_head (PF04732.4)          | Filament (PF00038.11)    |                        |                             |                          |                     |
| act15      | HEAT (PF02985.12)                  | Arm (PF00514.13)         |                        |                             |                          |                     |
| act16      | CH (PF00307.21)                    | Spectrin (PF00435.11)    | efhand (PF00036.22)    | GAS2 (PF02187.8)            | Tropomyosin (PF00261.10) | DUF1690 (PF07956.2) |
| act17      | Band_41 (PF00373.8)                | ERM (PF00769.9)          |                        |                             |                          |                     |
| act18      | Cofilin_ADF (PF00241.10)           |                          |                        |                             |                          |                     |
| act19      | P21-Arc (PF04062.5)                |                          |                        |                             |                          |                     |
| act20      | Band_41 (PF00373.8)                | ERM (PF00769.9)          |                        |                             |                          |                     |
| act21      | Band_41 (PF00373.8)                | Talin_middle (PF09141.1) | VBS (PF08913.1)        | I_LWEQ (PF01608.8)          |                          |                     |
| act22      | Septin (PF00735.9)                 |                          |                        |                             |                          |                     |
| act23      | efhand (PF00036.22)                | CH (PF00307.21)          |                        |                             |                          |                     |
| act24      | BRCT (PF00533.16)                  | RhoGEF (PF00621.11)      | PH (PF00169.19)        |                             |                          |                     |
| act25      | Band_41 (PF00373.8)                | FA (PF08736.1)           | SAB (PF04382.3)        | 4_1_CTD (PF05902.3)         |                          |                     |
| act26      | CH (PF00307.21)                    | Filamin (PF00630.9)      |                        |                             |                          |                     |
| act27      | CH (PF00307.21)                    | Spectrin (PF00435.11)    | PH (PF00169.19)        |                             |                          |                     |
| act28      | CH (PF00307.21)                    | Spectrin (PF00435.11)    | efhand (PF00036.22)    | efhand_Ca_insen (PF08726.1) |                          |                     |
| act29      | P34-Arc (PF04045.5)                |                          |                        |                             |                          |                     |
| act30      | CH (PF00307.21)                    | Calponin (PF00402.8)     |                        |                             |                          |                     |
| act31      | Drf_GBD (PF06371.4)                | Drf_FH3 (PF06367.7)      | FH2 (PF02181.13)       |                             |                          |                     |
| act32      | Ras (PF00071.12)                   | Arf (PF00025.11)         |                        |                             |                          |                     |
| act34      | Band_41 (PF00373.8)                | ERM (PF00769.9)          |                        |                             |                          |                     |
| act35      | Vinculin (PF01044.9)               | MCPsignal (PF00015.11)   | ArgJ (PF01960.9)       |                             |                          |                     |
| act36      | DUF1899 (PF08953.1)                | WD40 (PF00400.22)        | DUF1900 (PF08954.1)    |                             |                          |                     |
| act37      | Septin (PF00735.9)                 | MMR_HSR1 (PF01926.13)    |                        |                             |                          |                     |
| act38      | Profilin (PF00235.9)               |                          |                        |                             |                          |                     |
| act39      | TBPIP (PF07106.3)                  |                          |                        |                             |                          |                     |
| act40      | Extensin_2 (PF04554.4)             | CH (PF00307.21)          |                        |                             |                          |                     |
| act41      | PDZ (PF00595.14)                   | SH3_2 (PF07653.7)        |                        |                             |                          |                     |
| act42      | efhand (PF00036.22)                |                          |                        |                             |                          |                     |
| act43      | PDZ (PF00595.14)                   | LIM (PF00412.12)         |                        |                             |                          |                     |
| act44      | Actin (PF00022.9)                  |                          |                        |                             |                          |                     |
| act45      | BAR (PF03114.8)                    | RhoGAP (PF00620.17)      |                        |                             |                          |                     |
| act46      | BTB (PF00651.21)                   | BACK (PF07707.5)         | Kelch_1 (PF01344.15)   | Kelch_2 (PF07646.5)         |                          |                     |
| kin1       | Pkinase (PF00069.15)               |                          |                        |                             |                          |                     |
| kin2       | Pkinase (PF00069.15)               |                          |                        |                             |                          |                     |
| kin3       | CK_II_beta (PF01214.9)             |                          |                        |                             |                          |                     |
| kin4       | Pkinase (PF00069.15)               |                          |                        |                             |                          |                     |
| kin5       | CKS (PF01111.9)                    |                          |                        |                             |                          |                     |
| kin7       | Pkinase (PF00069.15)               | Pkinase_C (PF00433.14)   | ATG16 (PF08614.1)      | C1_1 (PF00130.12)           | PH (PF00169.19)          | CNH (PF00780.12)    |
| kin8       | No domain detected above threshold |                          |                        |                             |                          |                     |
| kin9       | Pkinase (PF00069.15)               | HEAT (PF02985.12)        |                        |                             |                          |                     |
| kin10      | Nucleoplasmin (PF03066.5)          |                          |                        |                             |                          |                     |
| kin11      | Pkinase (PF00069.15)               | POLO_box (PF00659.9)     |                        |                             |                          |                     |
| kin12      | Metallophos (PF00149.18)           |                          |                        |                             |                          |                     |
| kin13      | HEAT (PF02985.12)                  |                          |                        |                             |                          |                     |
| kin14      | Metallophos (PF00149.18)           |                          |                        |                             |                          |                     |
| kin15      | LRR_1 (PF00560.23)                 |                          |                        |                             |                          |                     |
| kin16      | LRR_1 (PF00560.23)                 |                          |                        |                             |                          |                     |

|         |                              |                             |                           |                          |  |
|---------|------------------------------|-----------------------------|---------------------------|--------------------------|--|
| kin17   | Pkinase (PF00069.15)         |                             |                           |                          |  |
| kin18   | Pkinase (PF00069.15)         | UVR (PF02151.9)             | Pkinase_Tyr (PF07714.7)   |                          |  |
| mic1    | Tubulin (PF00091.15)         | Tubulin_C (PF03953.7)       |                           |                          |  |
| mic2    | Tubulin (PF00091.15)         | Tubulin_C (PF03953.7)       |                           |                          |  |
| mic3    | Kinesin (PF00225.13)         | DHC_N1 (PF08385.2)          |                           |                          |  |
| mic4    | CAP_GLY (PF01302.15)         | bZIP_1 (PF00170.11)         | Myosin_tail_1 (PF01576.9) |                          |  |
| mic5    | CAP_GLY (PF01302.15)         |                             |                           |                          |  |
| mic6    | Dynamitin (PF04912.4)        | OKR_DC_1_C (PF03711.5)      |                           |                          |  |
| mic7    | DHC_N1 (PF08385.2)           | DHC_N2 (PF08393.3)          | AAA_5 (PF07728.4)         | Dynein_heavy (PF03028.6) |  |
| mic8    | CH (PF00307.21)              | EB1 (PF08393.3)             |                           |                          |  |
| mic9    | Spc97_Spc98 (PF04130.4)      |                             |                           |                          |  |
| mic10   | Kinesin (PF00225.13)         | ERM (PF00769.9)             |                           |                          |  |
| mic11   | Kinesin (PF00225.13)         |                             |                           |                          |  |
| mic12   | Kinesin (PF00225.13)         |                             |                           |                          |  |
| mic13   | Rab5-bind (PF09311.1)        | TPR_2 (PF07719.7)           | TPR_1 (PF00515.18)        |                          |  |
| mic14   | MAP1B_neuraxin (PF00414.8)   |                             |                           |                          |  |
| mic15   | Kinesin (PF00225.13)         |                             |                           |                          |  |
| mic16   | Kinesin (PF00225.13)         |                             |                           |                          |  |
| mic17   | HEAT (PF02985.12)            |                             |                           |                          |  |
| mic18   | HEAT (PF02985.12)            |                             |                           |                          |  |
| oth1    | WD40 (PF00400.22)            |                             |                           |                          |  |
| oth2    | Siah-Interact_N (PF09032.1)  | CS (PF04969.6)              | SGS (PF05002.5)           |                          |  |
| oth3    | S_100 (PF01023.9)            |                             |                           |                          |  |
| oth4    | TPR_1 (PF00515.18)           |                             |                           |                          |  |
| oth5    | WD40 (PF00400.22)            |                             |                           |                          |  |
| oth6    | CDI (PF02234.9)              |                             |                           |                          |  |
| oth7    | Cullin (PF00888.12)          |                             |                           |                          |  |
| oth8    | ER (PF01133.8)               |                             |                           |                          |  |
| oth9    | WD40 (PF00400.22)            |                             |                           |                          |  |
| oth10   | GDNF (PF02351.6)             |                             |                           |                          |  |
| oth11   | G-alpha (PF00503.10)         |                             |                           |                          |  |
| oth12   | Filament (PF00038.11)        |                             |                           |                          |  |
| oth13   | Filament (PF00038.11)        |                             |                           |                          |  |
| oth14   | Mago_nashi (PF02792.5)       |                             |                           |                          |  |
| oth15   | MAPKK1_Int (PF08923.1)       |                             |                           |                          |  |
| oth16   | C2 (PF00168.20)              | WW (PF00397.16)             | HECT (PF00632.15)         |                          |  |
| oth17   | Noggin (PF05806.3)           |                             |                           |                          |  |
| oth18   | WH1 (PF00568.13)             | VASP_tetra (PF08776.1)      |                           |                          |  |
| oth19   | Saccharop_dh (PF03435.8)     |                             |                           |                          |  |
| oth20   | Utp11 (PF03998.4)            |                             |                           |                          |  |
| oth21   | SPC25 (PF06703.2)            |                             |                           |                          |  |
| oth22   | Acid_phosphat_A (PF00328.12) |                             |                           |                          |  |
| oth23   | Arm (PF00514.13)             |                             |                           |                          |  |
| oth24   | DNA_pol_phi (PF04931.4)      |                             |                           |                          |  |
| oth25   | Torsin (PF06309.2)           |                             |                           |                          |  |
| sec1    | zf-piccolo (PF05715.3)       | Extensin_2 (PF04554.4)      | PDZ (PF00595.14)          | C2 (PF00168.20)          |  |
| sec2    | Arf (PF00025.11)             |                             |                           |                          |  |
| sec3    | Annexin (PF00191.10)         |                             |                           |                          |  |
| sec4    | Annexin (PF00191.10)         |                             |                           |                          |  |
| sec5    | Annexin (PF00191.10)         |                             |                           |                          |  |
| sec6    | Ataxin-2_N (PF06741.3)       | PAM2 (PF07145.5)            |                           |                          |  |
| sec7    | HSP70 (PF00012.10)           |                             |                           |                          |  |
| sec8    | S_100 (PF01023.9)            | efhand (PF00036.22)         |                           |                          |  |
| sec9    | ANTH (PF07651.6)             |                             |                           |                          |  |
| sec1012 | Calreticulin (PF00262.8)     |                             |                           |                          |  |
| sec11   | S_100 (PF01023.9)            |                             |                           |                          |  |
| sec13   | Clat_adaptor_s (PF01217.10)  | Adap_comp_sub (PF00928.11)  |                           |                          |  |
| sec14   | Clathrin_propel (PF01394.10) | Clathrin (PF09268.1)        | Clathrin (PF00637.10)     |                          |  |
| sec15   | ig (PF00047.15)              | I (PF07679.6)               | fn3 (PF00041.11)          | V-set (PF07686.7)        |  |
| sec16   | WD40 (PF00400.22)            | Coatomer_WDAD (PF04053.4)   | COPI_C (PF06957.2)        |                          |  |
| sec17   | Adaptin_N (PF01602.10)       | Coatamer_beta_C (PF07718.3) |                           |                          |  |
| sec18   | C2 (PF00168.20)              | Copine (PF07002.6)          |                           |                          |  |

|           |                                           |                         |                      |                           |                        |
|-----------|-------------------------------------------|-------------------------|----------------------|---------------------------|------------------------|
| sec192021 | Dynamin_N (PF00350.13)                    | Dynamin_M (PF01031.10)  | GED (PF02212.8)      |                           |                        |
| sec22     | HEAT (PF02985.12)                         |                         |                      |                           |                        |
| sec23     | Dynamin_N (PF00350.13)                    | efhand (PF00036.22)     |                      |                           |                        |
| sec24     | BAR (PF03114.8)                           | SH3_1 (PF00018.18)      | IMD (PF08397.1)      | SH3_2 (PF07653.7)         |                        |
| sec25     | HATPase_c (PF02518.16)                    | HSP90 (PF00183.9)       |                      |                           |                        |
| sec26     | Band_7 (PF01145.15)                       | Flotillin (PF03149.6)   |                      |                           |                        |
| sec27     | PDZ (PF00595.14)                          |                         |                      |                           |                        |
| sec28     | C2 (PF00168.20)                           |                         |                      |                           |                        |
| sec29     | GPP34 (PF05719.2)                         |                         |                      |                           |                        |
| sec30     | GRASP55_65 (PF04495.4)                    |                         |                      |                           |                        |
| sec31     | G-alpha (PF00503.10)                      | Arf (PF00025.11)        |                      |                           |                        |
| sec32     | Spectrin (PF00435.11)                     | RhoGEF (PF00621.11)     | PH (PF00169.19)      |                           |                        |
| sec33     | C2 (PF00168.20)                           | Fer1 (PF08151.2)        | FerA (PF08165.2)     | FerB (PF08150.2)          |                        |
| sec34     | Myosin_head (PF00063.11)                  | IQ (PF00612.17)         |                      |                           |                        |
| sec35     | NIPSNAP (PF07978.3)                       |                         |                      |                           |                        |
| sec36     | CDC48_N (PF02359.8)                       | CDC48_2 (PF02933.7)     | AAA (PF00004.19)     |                           |                        |
| sec37     | efhand_like (PF09279.1)                   | PI (PF00388.9)          | PI-PLC-Y (PF00387.9) | C2 (PF00168.20)           | PLC-beta_C (PF08703.1) |
| sec38     | GDI (PF00996.9)                           |                         |                      |                           |                        |
| sec39     | Ras (PF00071.12)                          |                         |                      |                           |                        |
| sec40     | Kinesin (PF00225.13)                      |                         |                      |                           |                        |
| sec41     | Ras (PF00071.12)                          |                         |                      |                           |                        |
| sec42     | WD40 (PF00400.22)                         |                         |                      |                           |                        |
| sec43     | WD40 (PF00400.22)                         |                         |                      |                           |                        |
| sec44     | zf-Sec23_Sec24 (PF04810.5)                | Sec23_trunk (PF04811.5) | Sec23_BS (PF08033.2) | Sec23_helical (PF04815.5) | Gelsolin (PF00626.12)  |
| sec45     | WD40 (PF00400.22)                         | Extensin_2 (PF04554.4)  |                      |                           |                        |
| sec46     | Vps52 (PF04129.3)                         |                         |                      |                           |                        |
| sec47     | PX (PF00787.14)                           | Vps5 (PF09325.1)        |                      |                           |                        |
| sec48     | dsrm (PF00035.15)                         |                         |                      |                           |                        |
| sec49     | <i>No domain detected above threshold</i> |                         |                      |                           |                        |
| sec50     | Torsin (PF06309.2)                        |                         |                      |                           |                        |
| sec51     | Vps35 (PF03635.7)                         |                         |                      |                           |                        |
| sec52     | Motile_Sperm (PF00635.16)                 |                         |                      |                           |                        |
| sec53     | Patched (PF02460.9)                       |                         |                      |                           |                        |
