# Supplementary material for: A Complex Cell Division Machinery Was Present in the Last Common Ancestor of Eukaryotes
Source: PubMed Central journal article supplement (PMC2661371; doi:10.1371/journal.pone.0005021), 2009-04-07
Supplement: pone.0005021.s009.pdf [file pone.0005021.s009.pdf]

Supplementary Information Table S3.

Comparison with the domain composition of the orthologues found in various eukaryotes

| Short name | <i>S. cerevisiae</i> | <i>S. pombe</i> | <i>Cryptococcus neoformans</i> | <i>Ustilago maydis</i> | <i>Dictyostelium discoideum</i> | <i>Entamoeba histolytica</i> | <i>A. thaliana</i> | <i>O.sativa</i> | <i>Ostreococcus tauri</i> | <i>Paramecium tetraurelia</i> | <i>Cryptosporidium hominis</i> | <i>Plasmodium falciparum</i> | <i>Theileria annulata</i> | <i>Phytophthora ramorum</i> | <i>Thalassiosira pseudonana</i> | <i>Trypanosoma brucei</i> | <i>Leishmania major</i> | <i>Trichomonas vaginalis</i> | <i>Giardia lamblia</i> | <i>Aspergillus fumigatus</i> | <i>Neurospora crassa</i> |   |
|------------|----------------------|-----------------|--------------------------------|------------------------|---------------------------------|------------------------------|--------------------|-----------------|---------------------------|-------------------------------|--------------------------------|------------------------------|---------------------------|-----------------------------|---------------------------------|---------------------------|-------------------------|------------------------------|------------------------|------------------------------|--------------------------|---|
| act1       | *                    | *               | *                              | *                      | *                               | *                            | *                  | *               | *                         | *                             | *                              | *                            | *                         | *                           | *                               | *                         | *                       | *                            | *                      | *                            | *                        |   |
| act2       | no                   | no              | no                             | no                     | no                              | no                           | no                 | no              | no                        | no                            | no                             | no                           | no                        | no                          | no                              | no                        | no                      | no                           | no                     | no                           | no                       |   |
| act3       | *                    | *               | *                              | *                      | *                               | *                            | *                  | *               | *                         | *                             | no                             | no                           | no                        | *                           | no                              | *                         | *                       | *                            | no                     | *                            | *                        |   |
| act4       | *                    | *               | *                              | *                      | *                               | *                            | *                  | *               | no                        | *                             | *                              | no                           | no                        | *                           | no                              | *                         | no                      | *                            | no                     | *                            | *                        |   |
| act5       | *                    | *               | *                              | *                      | *                               | *                            | *                  | *               | *                         | *                             | no                             | no                           | no                        | *                           | no                              | *                         | *                       | *                            | no                     | *                            | *                        |   |
| act6       | no                   | *               | *                              | *                      | *                               | no                           | *                  | *               | *                         | no                            | no                             | no                           | no                        | *                           | \$                              | no                        | no                      | no                           | no                     | *                            | no                       |   |
| act7       | *                    | *               | *                              | *                      | *                               | *                            | *                  | *               | *                         | *                             | *                              | *                            | *                         | *                           | *                               | *                         | *                       | *                            | *                      | no                           | *                        | * |
| act8       | \$                   | \$              | \$                             | \$                     | \$                              | \$                           | \$                 | \$              | \$                        | \$                            | \$                             | \$                           | \$                        | no                          | \$                              | \$                        | \$                      | no                           | no                     | \$                           | \$                       |   |
| act9       | \$                   | \$              | \$                             | \$                     | \$                              | \$                           | no                 | no              | no                        | no                            | no                             | no                           | no                        | no                          | no                              | no                        | no                      | no                           | no                     | \$                           | \$                       |   |
| act10      | *                    | *               | \$                             | \$                     | \$                              | \$                           | no                 | no              | no                        | no                            | no                             | no                           | no                        | no                          | no                              | no                        | no                      | no                           | no                     | \$                           | \$                       |   |
| act11      | *                    | no              | *                              | *                      | *                               | *                            | no                 | no              | no                        | no                            | no                             | no                           | no                        | no                          | no                              | no                        | no                      | no                           | no                     | *                            | *                        |   |
| act12      | no                   | *               | *                              | *                      | *                               | *                            | *                  | *               | no                        | *                             | no                             | *                            | no                        | *                           | no                              | no                        | no                      | *                            | no                     | *                            | *                        |   |
| act13      | no                   | no              | no                             | no                     | no                              | no                           | no                 | no              | no                        | no                            | no                             | no                           | no                        | no                          | no                              | no                        | no                      | no                           | no                     | no                           | no                       |   |
| act14      | no                   | no              | no                             | no                     | no                              | no                           | no                 | no              | no                        | no                            | no                             | no                           | no                        | no                          | no                              | no                        | no                      | no                           | no                     | no                           | no                       |   |
| act15      | no                   | no              | no                             | no                     | no                              | no                           | no                 | no              | no                        | no                            | no                             | no                           | no                        | no                          | no                              | no                        | no                      | no                           | no                     | no                           | no                       |   |
| act16      | no                   | no              | no                             | no                     | no                              | no                           | no                 | no              | no                        | no                            | no                             | no                           | no                        | no                          | no                              | no                        | no                      | no                           | no                     | no                           | no                       |   |
| act17      | no                   | no              | no                             | no                     | no                              | no                           | no                 | no              | no                        | no                            | no                             | no                           | no                        | no                          | no                              | no                        | no                      | no                           | no                     | no                           | no                       |   |
| act18      | no                   | \$              | \$                             | \$                     | no                              | \$                           | no                 | no              | no                        | no                            | no                             | no                           | no                        | no                          | no                              | no                        | no                      | no                           | no                     | \$                           | \$                       |   |
| act19      | *                    | *               | *                              | *                      | *                               | *                            | *                  | *               | no                        | *                             | no                             | no                           | no                        | *                           | no                              | *                         | no                      | *                            | no                     | *                            | *                        |   |
| act20      | no                   | no              | no                             | no                     | no                              | no                           | no                 | no              | no                        | no                            | no                             | no                           | no                        | no                          | no                              | no                        | no                      | no                           | no                     | no                           | no                       |   |
| act21      | no                   | no              | no                             | no                     | no                              | no                           | no                 | no              | no                        | no                            | no                             | no                           | no                        | no                          | no                              | no                        | no                      | no                           | no                     | no                           | no                       |   |
| act22      | *                    | \$              | *                              | *                      | no                              | no                           | no                 | no              | no                        | no                            | no                             | no                           | no                        | no                          | no                              | no                        | no                      | no                           | no                     | *                            | *                        |   |
| act23      | \$                   | *               | \$                             | *                      | *                               | no                           | \$                 | \$              | no                        | \$                            | no                             | no                           | no                        | \$                          | no                              | no                        | no                      | *                            | no                     | \$                           | \$                       |   |
| act24      | no                   | no              | no                             | no                     | no                              | no                           | no                 | no              | no                        | no                            | no                             | no                           | no                        | no                          | no                              | no                        | no                      | no                           | no                     | no                           | no                       |   |
| act25      | no                   | no              | no                             | no                     | no                              | no                           | no                 | no              | no                        | no                            | no                             | no                           | no                        | no                          | no                              | no                        | no                      | no                           | no                     | no                           | no                       |   |
| act26      | no                   | no              | no                             | no                     | no                              | no                           | no                 | no              | no                        | no                            | no                             | no                           | no                        | no                          | no                              | no                        | no                      | no                           | no                     | no                           | no                       |   |
| act27      | no                   | no              | no                             | no                     | no                              | no                           | no                 | no              | no                        | no                            | no                             | no                           | no                        | no                          | no                              | no                        | no                      | no                           | no                     | no                           | no                       |   |
| act28      | no                   | *               | *                              | \$                     | \$                              | \$                           | no                 | no              | no                        | no                            | no                             | no                           | no                        | \$                          | no                              | no                        | no                      | \$                           | no                     | \$                           | \$                       |   |
| act29      | *                    | *               | *                              | *                      | *                               | *                            | *                  | *               | *                         | *                             | no                             | no                           | no                        | \$                          | no                              | *                         | no                      | *                            | no                     | *                            | *                        |   |
| act30      | no                   | no              | no                             | no                     | no                              | no                           | no                 | no              | no                        | no                            | no                             | no                           | no                        | no                          | no                              | no                        | no                      | no                           | no                     | no                           | no                       |   |
| act31      | *                    | \$              | \$                             | \$                     | \$                              | no                           | no                 | no              | no                        | no                            | no                             | no                           | no                        | no                          | no                              | no                        | no                      | no                           | no                     | \$                           | \$                       |   |
| act32      | \$                   | *               | *                              | *                      | no                              | no                           | no                 | no              | no                        | no                            | no                             | no                           | no                        | no                          | no                              | no                        | no                      | no                           | no                     | \$                           | *                        |   |
| act34      | no                   | no              | no                             | no                     | no                              | no                           | no                 | no              | no                        | no                            | no                             | no                           | no                        | no                          | no                              | no                        | no                      | no                           | no                     | no                           | no                       |   |
| act35      | no                   | no              | no                             | no                     | no                              | no                           | no                 | no              | no                        | no                            | no                             | no                           | no                        | no                          | no                              | no                        | no                      | no                           | no                     | no                           | no                       |   |
| act36      | *                    | *               | \$                             | *                      | *                               | *                            | no                 | no              | no                        | *                             | *                              | \$                           | \$                        | *                           | *                               | *                         | *                       | *                            | no                     | *                            | *                        |   |
| act37      | *                    | *               | \$                             | *                      | no                              | no                           | no                 | no              | no                        | *                             | no                             | no                           | no                        | no                          | no                              | no                        | no                      | no                           | no                     | *                            | *                        |   |
| act38      | *                    | *               | *                              | *                      | *                               | *                            | *                  | *               | no                        | *                             | no                             | no                           | no                        | no                          | no                              | *                         | *                       | *                            | no                     | *                            | *                        |   |
| act39      | *                    | *               | *                              | no                     | no                              | no                           | *                  | *               | *                         | *                             | no                             | no                           | no                        | *                           | no                              | *                         | no                      | *                            | *                      | no                           | no                       |   |

|       |    |    |    |    |    |    |    |    |    |    |    |    |    |    |    |    |    |    |    |    |    |
|-------|----|----|----|----|----|----|----|----|----|----|----|----|----|----|----|----|----|----|----|----|----|
| act40 | no | no | no | no | no | no | no | no | no | no | no | no | no | no | no | no | no | no | no | no | no |
| act41 | no | no | no | no | no | no | no | no | no | no | no | no | no | no | no | no | no | no | no | no | no |
| act42 | *  | *  | *  | *  | *  | *  | no | no | no | no | no | no | no | no | no | no | no | no | no | no | no |
| act43 | no | no | no | no | no | no | no | no | no | no | no | no | no | no | no | no | no | no | no | no | no |
| act44 | *  | *  | *  | no | *  | no | *  | *  | *  | no | *  | no | no | no | no | no | no | no | no | *  | no |
| act45 | no | no | no | no | no | no | no | no | no | no | no | no | no | no | no | no | no | no | no | no | no |
| act46 | no | no | no | no | no | no | no | no | no | no | no | no | no | no | no | no | no | no | no | no | no |
| kin1  | *  | \$ | *  | *  | *  | no | *  | *  | *  | *  | no | no | no | *  | *  | no | no | *  | no | *  | \$ |
| kin2  | *  | *  | *  | *  | *  | *  | \$ | \$ | *  | no | *  | *  | \$ | *  | *  | *  | *  | *  | *  | *  | *  |
| kin3  | *  | *  | *  | *  | *  | *  | *  | *  | *  | *  | *  | *  | *  | *  | *  | *  | *  | *  | *  | *  | *  |
| kin4  | *  | \$ | *  | no | *  | *  | *  | *  | *  | *  | no | *  | *  | *  | no | no | no | no | no | *  | *  |
| kin5  | no | *  | *  | *  | \$ | *  | *  | *  | *  | *  | *  | *  | *  | *  | *  | *  | *  | *  | *  | *  | *  |
| kin7  | no | no | no | no | no | no | no | no | no | no | no | no | no | no | no | no | no | no | no | no | no |
| kin8  | no | no | no | no | no | no | no | no | no | no | *  | no | no | no | no | no | no | no | no | no | no |
| kin9  | \$ | \$ | \$ | \$ | *  | \$ | *  | *  | \$ | no | \$ | \$ | \$ | no | no | no | no | no | no | \$ | \$ |
| kin10 | no | no | no | no | no | no | no | no | no | no | no | no | no | no | no | no | no | no | no | no | no |
| kin11 | *  | *  | *  | *  | *  | *  | no | no | *  | *  | no | no | no | *  | \$ | *  | *  | *  | \$ | \$ | *  |
| kin12 | *  | *  | *  | no | *  | no | *  | *  | no | *  | *  | *  | *  | no | no | no | no | no | *  | *  | *  |
| kin13 | *  | *  | *  | *  | *  | *  | *  | *  | *  | no | no | no | no | no | no | no | no | no | no | \$ | \$ |
| kin14 | *  | *  | *  | no | *  | *  | *  | *  | *  | *  | no | *  | no | *  | no | *  | *  | *  | *  | *  | *  |
| kin15 | no | no | no | no | \$ | *  | *  | *  | no | no | no | no | no | no | \$ | \$ | \$ | no | no | no | no |
| kin16 | no | no | no | no | \$ | *  | *  | *  | \$ | no | \$ | \$ | no | no | no | no | \$ | no | no | no | no |
| kin17 | *  | *  | *  | \$ | \$ | no | *  | *  | \$ | no | no | no | no | no | no | no | no | *  | no | *  | *  |
| kin18 | no | no | no | no | no | no | no | no | no | no | no | no | no | no | no | no | no | no | no | no | no |
| mic1  | *  | *  | *  | *  | *  | *  | *  | *  | *  | *  | *  | *  | *  | *  | *  | *  | *  | *  | *  | *  | *  |
| mic2  | *  | *  | *  | *  | *  | *  | *  | *  | *  | *  | *  | *  | *  | *  | *  | *  | *  | *  | *  | *  | *  |
| mic3  | \$ | \$ | \$ | \$ | *  | \$ | \$ | \$ | *  | *  | \$ | \$ | no | *  | \$ | no | no | \$ | *  | \$ | \$ |
| mic4  | no | no | no | no | no | no | no | no | no | no | no | no | no | no | no | no | no | no | no | no | no |
| mic5  | no | no | *  | \$ | no | no | no | no | no | no | no | no | no | no | no | no | no | no | no | \$ | \$ |
| mic6  | no | no | \$ | no | \$ | no | no | no | no | no | no | no | no | no | no | no | no | no | no | *  | *  |
| mic7  | \$ | \$ | \$ | \$ | *  | no | no | no | no | \$ | no | \$ | \$ | \$ | no | \$ | \$ | *  | no | \$ | \$ |
| mic8  | *  | *  | *  | *  | *  | no | *  | *  | *  | *  | *  | *  | *  | \$ | \$ | no | no | *  | *  | \$ | *  |
| mic9  | *  | *  | *  | *  | *  | no | *  | *  | *  | *  | no | no | no | *  | *  | *  | *  | *  | *  | *  | *  |
| mic10 | \$ | \$ | \$ | \$ | no | no | \$ | \$ | *  | *  | no | no | no | no | no | *  | \$ | no | \$ | \$ | \$ |
| mic11 | *  | *  | *  | *  | *  | *  | *  | *  | *  | *  | no | no | no | no | no | *  | \$ | no | *  | *  | *  |
| mic12 | no | *  | \$ | \$ | *  | no | *  | *  | *  | *  | *  | *  | no | *  | \$ | *  | \$ | *  | *  | \$ | \$ |
| mic13 | no | no | no | no | no | no | no | no | no | no | no | no | no | no | no | no | no | no | no | no | no |
| mic14 | no | no | no | no | no | no | no | no | no | no | no | no | no | no | no | no | no | no | no | no | no |
| mic15 | no | no | no | no | *  | no | *  | *  | *  | *  | *  | *  | *  | *  | *  | *  | *  | *  | \$ | no | no |
| mic16 | no | no | no | no | no | no | no | no | no | no | no | no | no | no | no | no | no | no | no | no | no |
| mic17 | no | no | no | no | no | no | no | no | no | no | no | no | no | no | no | no | no | no | no | no | no |
| mic18 | no | no | *  | \$ | *  | no | *  | *  | \$ | \$ | no | no | no | no | no | no | no | no | no | no | no |
| oth1  | *  | *  | *  | *  | *  | \$ | *  | *  | *  | \$ | *  | no | *  | *  | *  | *  | *  | *  | \$ | *  | *  |
| oth2  | no | no | no | no | no | \$ | *  | *  | no | *  | \$ | *  | \$ | \$ | \$ | no | no | \$ | no | no | no |
| oth3  | no | no | no | no | no | no | no | no | no | no | no | no | no | no | no | no | no | no | no | no | no |
| oth4  | *  | *  | *  | *  | \$ | no | \$ | *  | *  | *  | *  | no | no | no | no | *  | *  | *  | no | *  | \$ |
| oth5  | *  | *  | *  | *  | *  | *  | *  | *  | \$ | *  | no | *  | no | *  | *  | *  | *  | *  | \$ | *  | *  |
| oth6  | no | no | no | no | no | no | no | no | no | no | no | no | no | no | no | no | no | no | no | no | no |
| oth7  | no | *  | *  | no | *  | *  | *  | *  | *  | *  | *  | *  | *  | *  | *  | \$ | *  | *  | no | *  | *  |

|           |    |    |    |    |    |    |    |    |    |    |    |    |    |    |    |    |    |    |    |    |    |
|-----------|----|----|----|----|----|----|----|----|----|----|----|----|----|----|----|----|----|----|----|----|----|
| oth8      | no | no | no | no | *  | no | *  | *  | no | no | *  | *  | no | *  | no | no | no | no | no | no | no |
| oth9      | *  | *  | *  | *  | *  | *  | *  | *  | *  | \$ | *  | 1  | *  | *  | *  | *  | \$ | *  | \$ | *  | *  |
| oth10     | no | no | no | no | no | no | no | no | no | no | no | no | no | no | no | no | no | no | no | no | no |
| oth11     | *  | *  | *  | *  | *  | *  | \$ | \$ | no | no | no | no | no | *  | *  | no | no | *  | no | *  | *  |
| oth12     | no | no | no | no | no | no | no | no | no | no | no | no | no | no | no | no | no | no | no | no | no |
| oth13     | no | no | no | no | no | no | no | no | no | no | no | no | no | no | no | no | no | no | no | no | no |
| oth14     | no | *  | *  | *  | *  | *  | *  | *  | *  | *  | no | *  | *  | *  | *  | *  | *  | no | no | *  | *  |
| oth15     | no | no | no | no | *  | no | no | no | no | no | no | no | no | \$ | no | no | no | *  | no | no | no |
| oth16     | *  | *  | *  | *  | no | no | no | no | no | no | no | no | no | no | no | no | no | no | no | *  | *  |
| oth17     | no | no | no | no | no | no | no | no | no | no | no | no | no | no | no | no | no | no | no | no | no |
| oth18     | no | no | no | no | no | no | no | no | no | no | no | no | no | no | no | no | no | no | no | no | no |
| oth19     | no | no | *  | *  | no | no | *  | *  | *  | no | *  | *  | no | *  | no | no | *  | no | no | *  | *  |
| oth20     | *  | *  | *  | *  | *  | *  | *  | *  | *  | *  | *  | *  | *  | *  | no | no | no | \$ | *  | *  | *  |
| oth21     | no | no | no | no | *  | no | *  | *  | no | no | no | no | no | no | no | no | no | no | no | no | no |
| oth22     | no | *  | \$ | \$ | \$ | no | *  | *  | \$ | \$ | *  | \$ | *  | *  | \$ | no | no | no | \$ | \$ | \$ |
| oth23     | \$ | *  | \$ | no | no | no | \$ | \$ | \$ | \$ | no | \$ | no | no | no | \$ | \$ | \$ | \$ | \$ | no |
| oth24     | no | *  | *  | *  | no | no | \$ | \$ | \$ | no | no | no | no | no | no | no | no | no | no | no | no |
| oth25     | no | no | no | no | no | no | no | no | no | no | no | no | no | no | no | no | no | no | no | no | no |
| sec1      | no | no | no | no | no | no | no | no | no | no | no | no | no | no | no | no | no | no | no | no | no |
| sec2      | *  | *  | *  | *  | *  | *  | *  | *  | *  | *  | *  | *  | *  | no | no | *  | *  | no | *  | *  | *  |
| sec3      | no | no | *  | *  | *  | no | *  | *  | *  | no | no | no | no | *  | *  | no | no | no | *  | *  | *  |
| sec4      | no | no | *  | *  | *  | no | *  | *  | *  | no | no | no | no | *  | *  | no | no | no | *  | *  | *  |
| sec5      | no | no | *  | *  | *  | no | *  | *  | no | no | no | no | no | *  | *  | no | no | no | *  | *  | *  |
| sec6      | no | no | no | no | no | no | no | no | no | no | no | no | no | no | no | no | no | no | no | no | no |
| sec7      | no | no | *  | *  | *  | *  | *  | *  | no | *  | *  | *  | *  | *  | no | *  | *  | *  | *  | *  | no |
| sec8      | no | no | no | no | no | no | no | no | no | no | no | no | no | no | no | no | no | no | no | no | no |
| sec9      | no | *  | \$ | \$ | *  | no | *  | *  | *  | no | no | no | no | no | no | *  | \$ | no | no | *  | *  |
| sec1012   | no | *  | *  | no | *  | *  | *  | *  | \$ | no | no | no | no | *  | no | no | no | *  | no | *  | *  |
| sec11     | no | no | no | no | no | no | no | no | no | no | no | no | no | no | no | no | no | no | no | no | no |
| sec13     | *  | *  | *  | *  | *  | \$ | \$ | \$ | \$ | \$ | no | no | no | \$ | \$ | no | no | \$ | *  | *  | *  |
| sec14     | *  | *  | *  | *  | *  | *  | *  | *  | \$ | \$ | \$ | \$ | \$ | *  | \$ | *  | \$ | \$ | \$ | \$ | *  |
| sec15     | no | no | no | no | no | no | no | no | no | no | no | no | no | no | no | no | no | no | no | no | no |
| sec16     | *  | *  | *  | *  | *  | \$ | *  | *  | *  | *  | *  | *  | *  | \$ | *  | *  | *  | *  | *  | *  | *  |
| sec17     | \$ | \$ | *  | \$ | no | no | \$ | \$ | \$ | no | no | no | no | \$ | \$ | no | no | no | no | *  | *  |
| sec18     | no | no | no | no | *  | no | *  | *  | no | *  | no | no | no | *  | no | no | \$ | *  | no | no | no |
| sec192021 | *  | *  | *  | *  | *  | *  | *  | *  | \$ | *  | \$ | *  | *  | *  | \$ | *  | *  | *  | *  | *  | *  |
| sec22     | *  | \$ | no | no | \$ | no | *  | *  | \$ | no | no | no | no | no | no | no | no | no | no | *  | *  |
| sec23     | no | no | no | no | *  | \$ | *  | *  | no | no | no | \$ | no | *  | \$ | no | no | no | no | no | no |
| sec24     | no | no | no | no | no | no | no | no | no | no | no | no | no | no | no | no | no | no | no | no | no |
| sec25     | *  | *  | *  | *  | *  | *  | *  | *  | *  | *  | *  | *  | no | no | no | *  | *  | *  | *  | *  | *  |
| sec26     | no | no | no | no | no | no | no | no | no | no | no | no | no | no | no | no | no | no | no | no | no |
| sec27     | no | no | no | no | no | no | no | no | no | no | no | no | no | no | no | no | no | no | no | no | no |
| sec28     | no | no | no | no | no | no | no | no | no | no | no | no | no | no | no | no | no | no | no | no | no |
| sec29     | *  | *  | *  | *  | no | no | no | no | no | no | no | no | no | no | no | no | no | no | no | *  | *  |
| sec30     | *  | *  | *  | *  | *  | no | no | no | no | *  | *  | *  | *  | *  | *  | no | no | no | no | *  | *  |
| sec31     | *  | *  | *  | no | *  | *  | \$ | *  | no | no | no | no | no | no | no | no | no | no | no | *  | *  |
| sec32     | no | no | no | no | no | no | no | no | no | no | no | no | no | no | no | no | no | no | no | no | no |
| sec33     | no | no | no | no | no | no | no | no | no | no | no | no | no | no | no | no | no | no | no | no | no |
| sec34     | *  | *  | \$ | \$ | \$ | \$ | *  | *  | \$ | *  | \$ | \$ | \$ | *  | \$ | \$ | \$ | no | no | \$ | \$ |
