# Supplementary material for: A Complex Cell Division Machinery Was Present in the Last Common Ancestor of Eukaryotes
Source: PubMed Central journal article supplement (PMC2661371; doi:10.1371/journal.pone.0005021), 2009-04-07
Supplement: pone.0005021.s011.pdf [file pone.0005021.s011.pdf]

Supplementary Information Table S5. Components of the midbody, fungal septum division and phragmoplast studied by Otegui et al. and their relations of orthology.

| Mammals                    |                                                                  | <i>S.pombe</i>         |                                             | <i>S.cerevisiae</i> |                                             | Plants                                                                 |                                             |
|----------------------------|------------------------------------------------------------------|------------------------|---------------------------------------------|---------------------|---------------------------------------------|------------------------------------------------------------------------|---------------------------------------------|
| From Otegui 2005           | Present in the mammalian midbody proteome                        | From Otegui 2005       | Orthologues of mammalian midbody components | From Otegui 2005    | Orthologues of mammalian midbody components | From Otegui 2005                                                       | Orthologues of mammalian midbody components |
| AuroraB/AIM-1              | Aurora kinase B (kin1)                                           | Ark1p                  | x                                           | Ipl1p               | x                                           | At-Aurora 1, -2                                                        | x                                           |
| EB1                        | EB1 (mic8)                                                       | Mal3p                  | x                                           | Bim1p               | x                                           | AtEB1 (A, B, C)                                                        | x                                           |
| KIFC1/CHO2,<br>KIFC2,KIFC3 | KIFC1/KAR3P HOMOLOG (mic11)<br>paralogues of KIFC1/KAR3P (mic11) | Pkl1p<br>Klp2p         | x<br>x                                      | Kar3p               | x                                           | AtK1/AtKatA, AtK2/AtKatB,<br>AtK3/AtKatC, AtK4/AtKatD,<br>AtK5, AtKCBP | no, x<br>x, x<br>x, no                      |
| BimC                       | BIMC KINESIN/EG5 (mic3)                                          | Cut7p                  | x                                           | Kip1p<br>Cin8p      | x<br>\$                                     | TKRP125,<br>DcKRP120-2                                                 | x<br>x                                      |
| PLK1-4                     | POLO-LIKE KINASE (kin11)                                         | Plo1p                  | x                                           | Cdc5p               | x                                           | At4g24400                                                              | \$                                          |
| Dynamin II                 | Dynamin (sec192021)                                              | Dnm1p                  | x                                           | Dnm1p               | x                                           | DRP2Ab,<br>AtDRP1/Phragmoplastin,<br>ADL1A,<br>ADL1E                   | \$<br>\$<br>\$<br>\$                        |
| ch-TOG/XMAP215 homolog     | TOG /XMAP215 HOMOLOG (mic18)                                     | Dis1p<br>Alp14p        | \$<br>\$                                    | Stu2p               | \$                                          | MOR1/GEM1                                                              | x                                           |
| KIF4                       | KIF4 (mic10)                                                     | -                      |                                             | -                   |                                             | FRA1/At5g47820,<br>At3g50170,<br>At5g60930                             | x<br>x<br>x                                 |
| CLIP-170/Restin            | CLIP-170 (mic4)                                                  | Tip1p                  |                                             | Bik1p               |                                             | MCLIP-170                                                              |                                             |
| MKLP1/CHO1,<br>RabK6/MKLP2 | MKLP1 (mic16)                                                    | -                      |                                             | -                   |                                             | At1g20060 (AtT20H2.17)                                                 |                                             |
| p34cdc2/CDK1               | paralogue of CDC2 KINASE (kin4)                                  | Cdc2p                  | \$                                          | Cdc28p              | \$                                          | CDC2                                                                   | \$                                          |
| Formin/mDia                |                                                                  | Bni1p                  |                                             | Cdc12p              |                                             | AtFH5                                                                  | \$                                          |
| TD-60                      |                                                                  | Pim1p                  |                                             | -                   |                                             | At1g19880                                                              |                                             |
| Syntaxin 2                 |                                                                  | -                      |                                             | -                   |                                             | KNOLLE/AtSYP111                                                        |                                             |
| Borealin/CDCa8             |                                                                  | -                      |                                             | -                   |                                             | -                                                                      |                                             |
| TACC1                      |                                                                  | -                      |                                             | -                   |                                             | -                                                                      |                                             |
| Cdc14a                     |                                                                  | Cdc14p,<br>Clp1p/Fip1p |                                             | Cdc14p              |                                             | -                                                                      |                                             |
| PRC1                       |                                                                  | Ase1p                  |                                             | Ase1p               |                                             | MAP-65                                                                 |                                             |
| MgcRacGAP                  |                                                                  | Rga7p                  |                                             | Rgd1p               |                                             | At4g24580                                                              |                                             |
| INCENP                     |                                                                  | Pic1p                  |                                             | Sli15p              |                                             | -                                                                      |                                             |
| Survivin                   |                                                                  | Bir1p/Cut17p           |                                             | Bir1p               |                                             | -                                                                      |                                             |
